# Supplementary material for: Geophysical evidence of consecutive evolution of Tamins rockslide and lake formation, Flims rockslide, and Bonaduz push wave gravels with embedded Toma hills
Source: Copernicus journal article supplement (doi:10.5194/esurf-2022-20), 2022-06-03
Supplement: Supplementary file 1 [file esurf-2022-20-supplement.pdf]

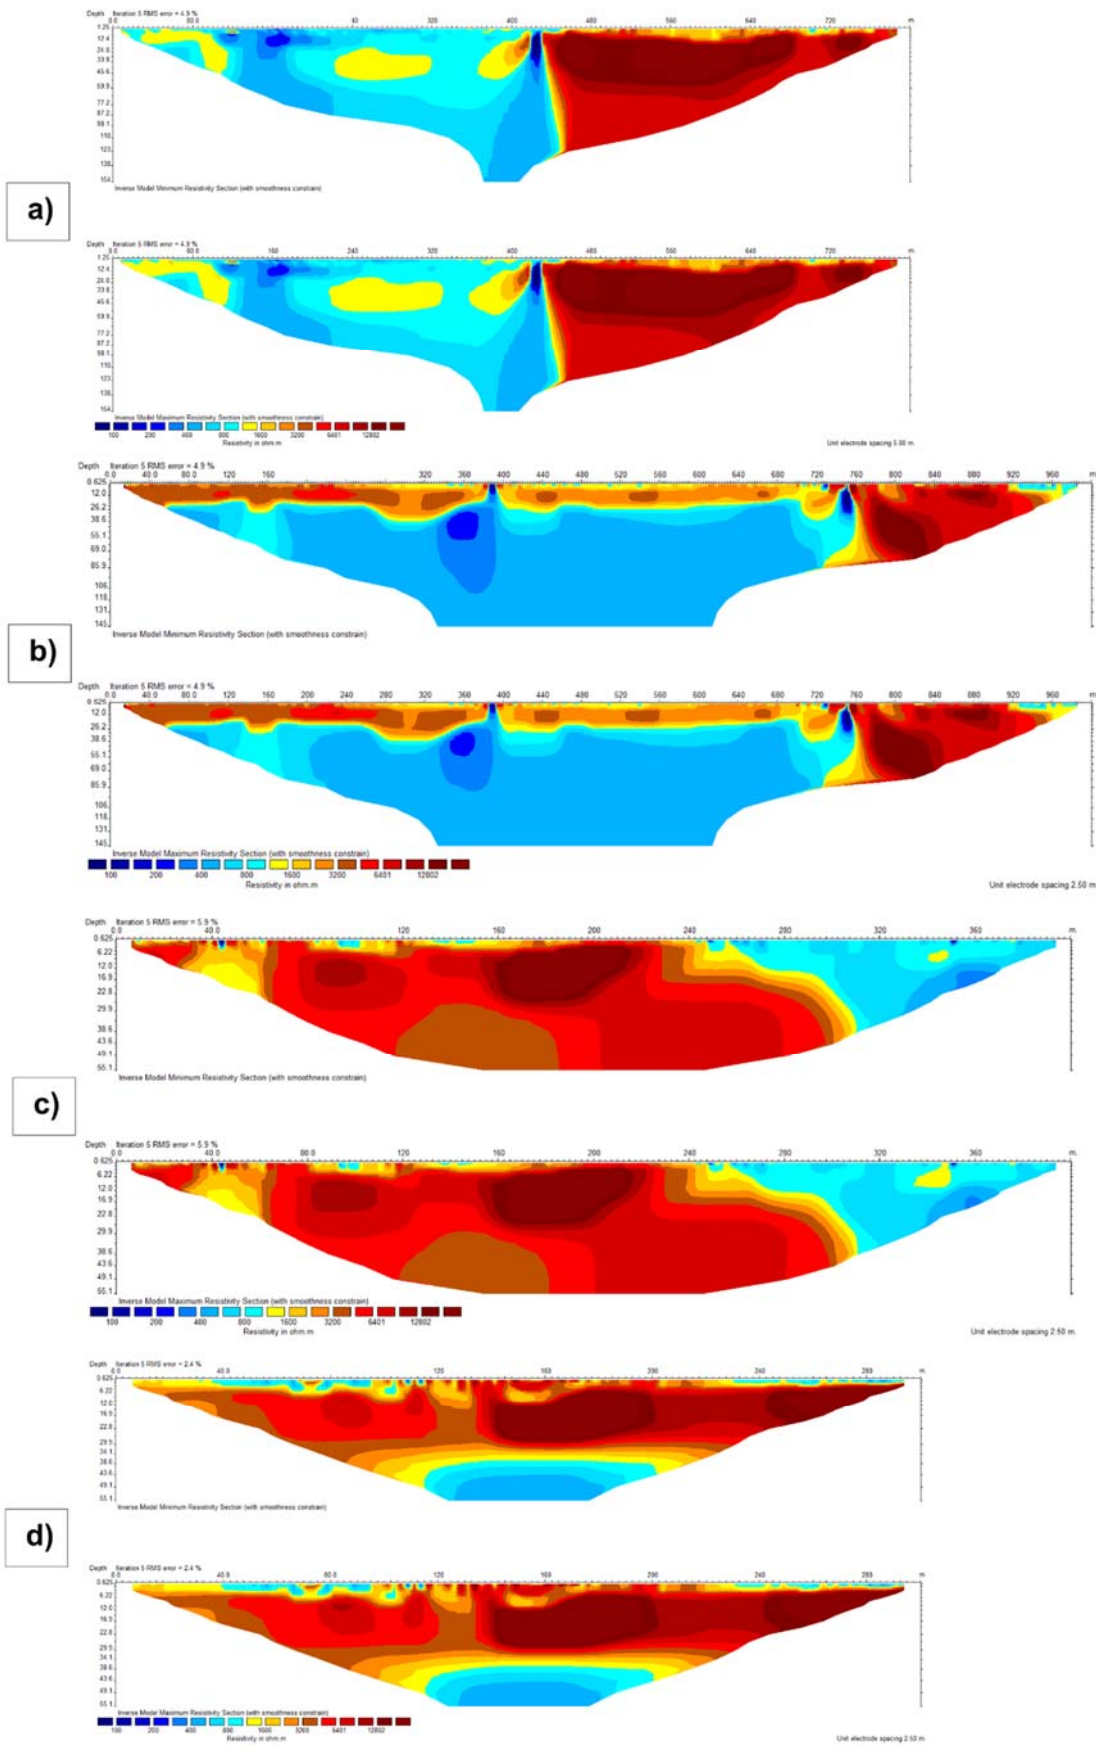

**Figure S1: MinMax-Plots of ERT-profiles P1-P4 (a-d) depicting each the modelled inversion with the minimum values (top) and maximum values (bottom) within the error range. Colour differences occur only sparsely and according to the error range at the specific location.**
